# Supplementary material
Source: PubMed Central journal article supplement (PMC2755701)

## Supplemental Data

### LOSS OF PARKIN OR PINK1 FUNCTION INCREASES DRP1-DEPENDENT MITOCHONDRIAL FRAGMENTATION

**A. Kathrin Lutz<sup>1§</sup>, Nicole Exner<sup>2§</sup>, Mareike E. Fett<sup>1§</sup>, Julia S. Schlehe<sup>1</sup>, Karina Kloos<sup>3</sup>, Kerstin Lämmermann<sup>1</sup>, Bettina Brunner<sup>2</sup>, Annerose Kurz-Drexler<sup>3</sup>, Frank Vogel<sup>4</sup>, Andreas S. Reichert<sup>5</sup>, Lena Bouman<sup>1</sup>, Daniela Vogt-Weisenhorn<sup>3</sup>, Wolfgang Wurst<sup>3</sup>, Jörg Tatzelt<sup>1</sup>, Christian Haass<sup>2</sup> and Konstanze F. Winklhofer<sup>1\*</sup>**

<sup>1</sup>Neurobiochemistry, <sup>2</sup>Biochemistry, Deutsches Zentrum für Neurodegenerative Erkrankungen and Adolf Butenandt Institute, Ludwig Maximilians University, 80336 Munich, Germany, <sup>3</sup>Helmholtz Center Munich, Institute of Developmental Genetics, Technical University Munich and Deutsches Zentrum für Neurodegenerative Erkrankungen, <sup>4</sup>Max-Delbrück-Center for Molecular Medicine, 13092 Berlin, Germany, <sup>5</sup>CEF Macromolecular Complexes, Mitochondrial Biology, Goethe University, 60590 Frankfurt am Main, Germany

§A.K.L., N.E. and M.E.F. contributed equally to this work  
Running head: Parkin, PINK1 and mitochondria

\*To whom correspondence should be addressed:

Konstanze F. Winklhofer, Schillerstr. 44, D-80336 Munich, telephone: +49 89 2180 75483, fax: +49 89 2180 75415, E-mail: [Konstanze.Winklhofer@med.uni-muenchen.de](mailto:Konstanze.Winklhofer@med.uni-muenchen.de)

### Figure Legends

**Supplemental Figure 1. A**, Abnormal mitochondrial morphology caused by parkin or PINK1 loss of function can be rescued by increasing mitochondrial fusion or decreasing fission. SH-SY5Y cells transfected with control siRNA or siRNA targeting parkin were stained with the fluorescent dye DiOC<sub>6</sub>(3) to visualize mitochondria and analyzed by fluorescence microscopy. Shown are examples of mitochondrial morphologies of the experiments described in Fig. 3A, B, C, D. **B, C, D**, Expression controls to the experiments shown in Fig. 3E (B), Fig. 3F (C), Fig. 3G (D).  $\beta$ -Actin was used as a loading control. **B**, Parkin expression was detected by using the anti-

parkin polyclonal antibody 2132, expression of PINK1-V5 was detected using an anti-V5 monoclonal antibody. **C, D**, Expression of Drp1-FLAG and Mfn2-FLAG was detected using the anti-FLAG M2 monoclonal antibody, Drp1 K38E was visualized by an anti-Drp1 monoclonal antibody, and OPA1-HIS was detected by penta-HIS HRP conjugate mouse IgG.

**Supplemental Figure 2.** Parkin and PINK1 (at higher expression levels) can reduce mitochondrial fission induced by Drp1. SH-SY5Y cells were transfected with the constructs indicated. 24 hours after transfection, mitochondrial morphology of transfected cells (identified by the coexpression of mCherry) was assessed as described in Fig. 1. Shown are examples of mitochondrial morphologies of the experiments described in Fig. 4B.

**Supplemental Figure 3.** Downregulation of Mfn2 causes alterations in mitochondrial morphology which are not influenced by parkin. SH-SY5Y cells were transfected with control siRNA or one of three siRNAs targeting Mfn2 (SET 1). In SET 2 Mfn2 and parkin were silenced simultaneously. In SET 3, parkin was overexpressed in Mfn2-deficient cells. Three days after transfection the cells were stained with the fluorescent dye DiOC<sub>6</sub>(3) to visualize mitochondria and analyzed by fluorescence microscopy. Cells displaying an intact network of tubular mitochondria were classified as tubular. When this network was disrupted and mitochondria appeared predominantly spherical or rod-like the cells were classified as fragmented. For quantification, the mitochondrial morphology of at least 300 cells per plate was determined in a blinded manner. Quantifications were based on triplicates of at least three independent experiments. Shown is the percentage of cells with fragmented or

truncated mitochondria. **B.** The efficiency of Mfn2 and parkin silencing/expression is shown by Western blotting using an anti-Mfn2 polyclonal antibody or the monoclonal anti-parkin antibody PRK8.  $\beta$ -Actin was used as a loading control. **C.** Examples of mitochondrial morphologies of the experiments described in Supplemental Fig. 3A.

**A**

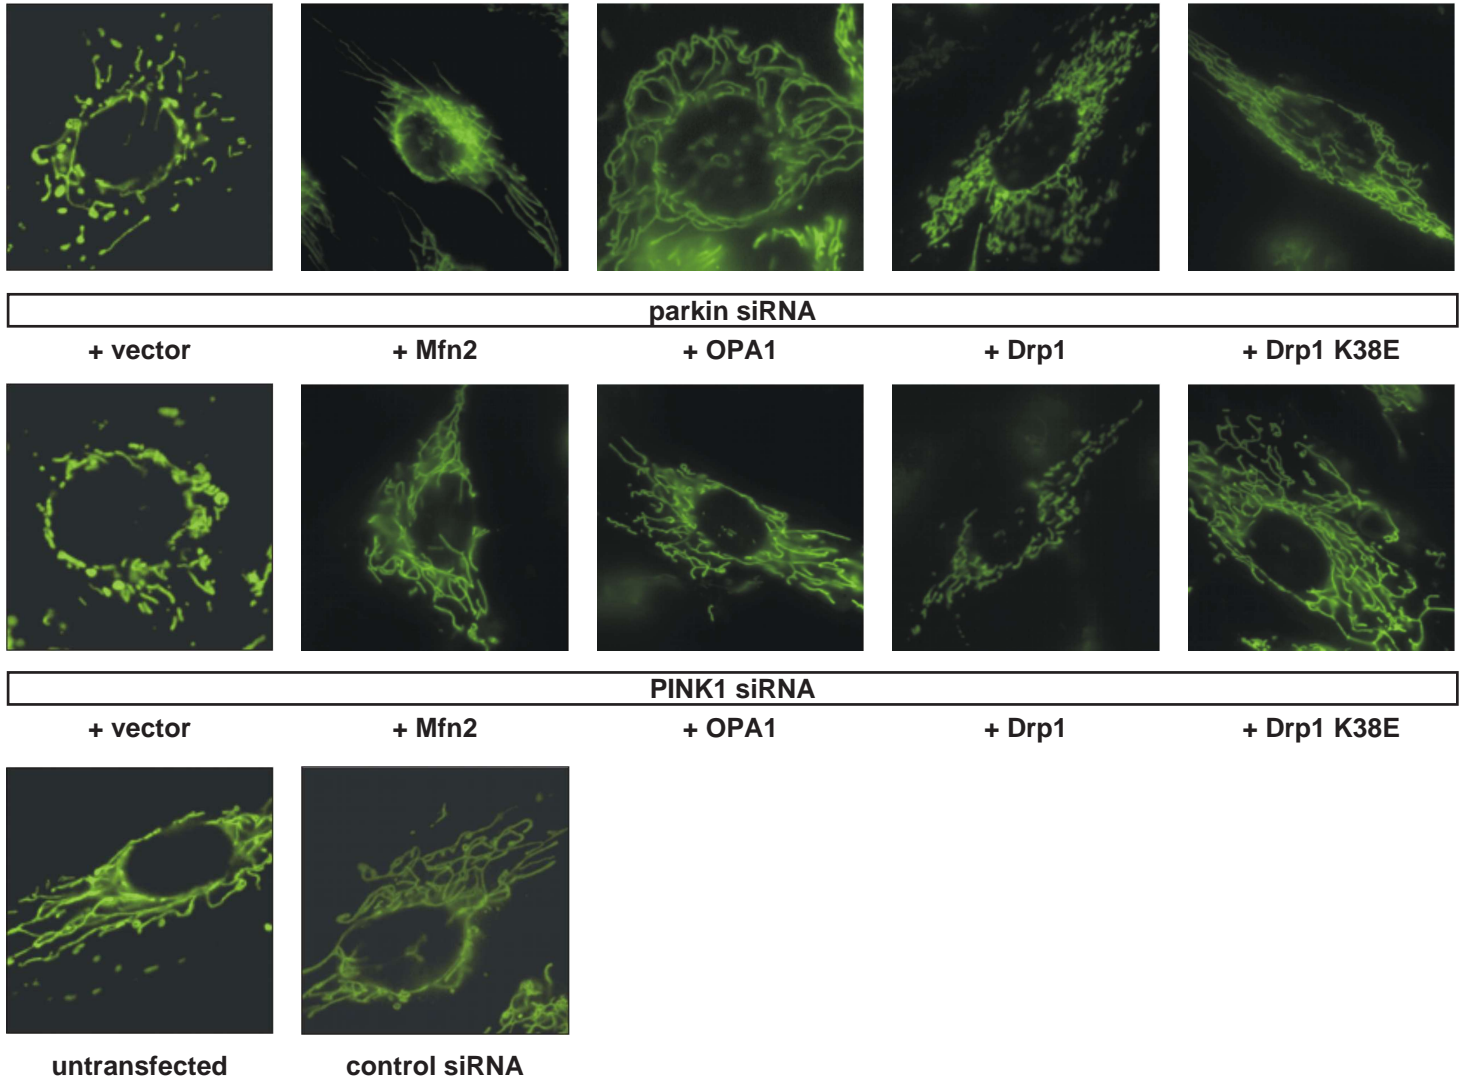

**B**

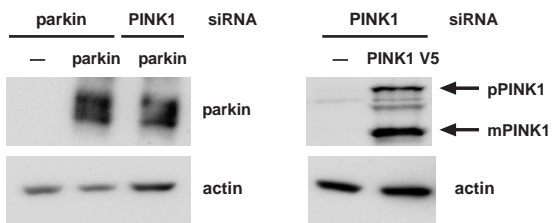

**C**

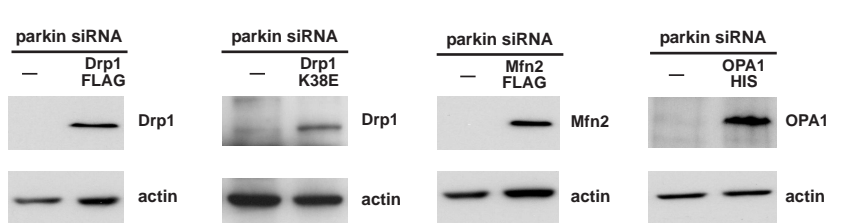

**D**

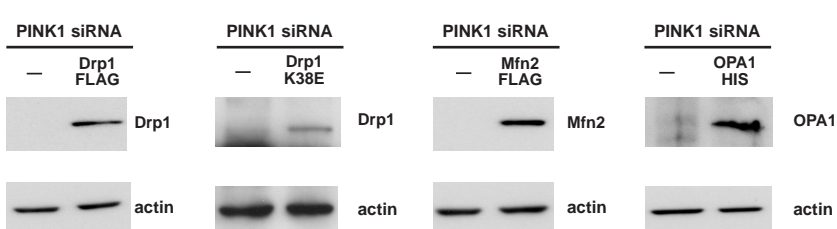

untransfected

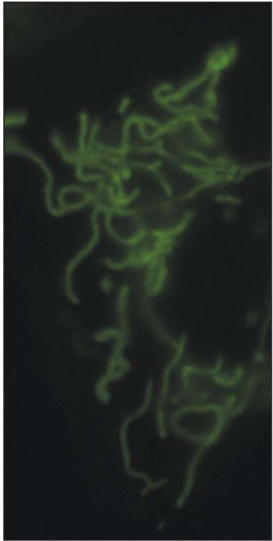

parkin

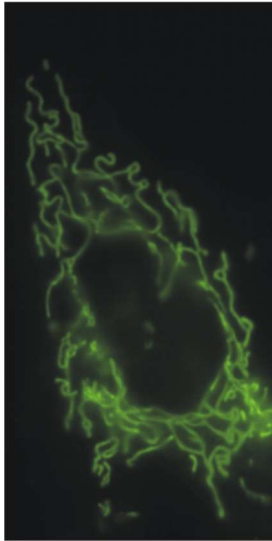

Drp1

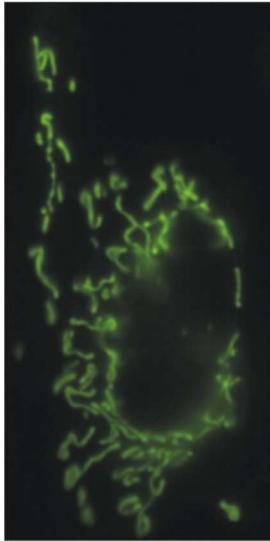

Drp1 + parkin

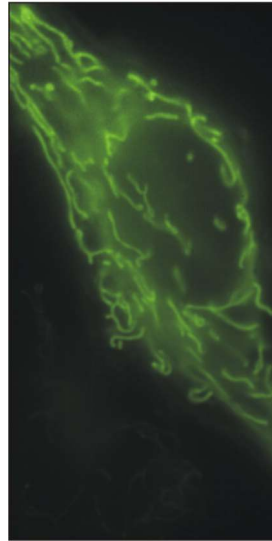

Drp1 +  $\Delta$ 1-79 parkin

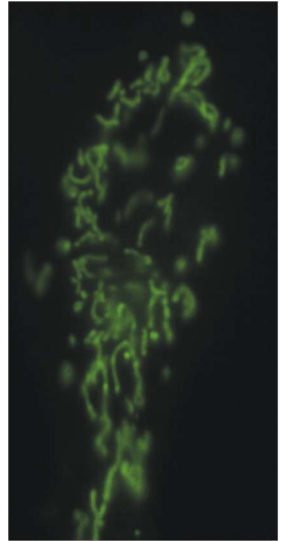

0.5 $\mu$ g PINK1

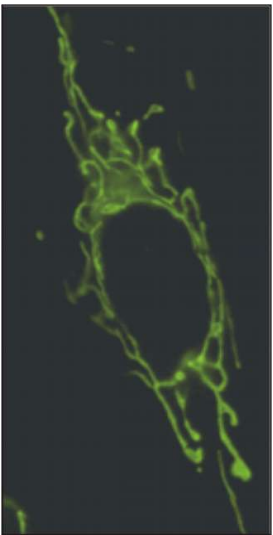

1 $\mu$ g PINK1

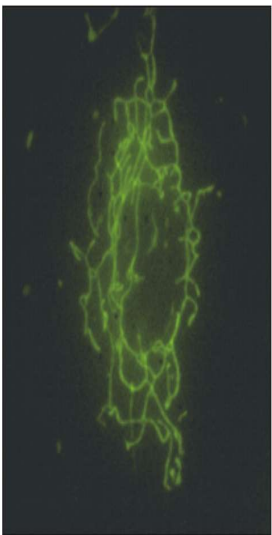

Drp1 + 0.5 $\mu$ g PINK1

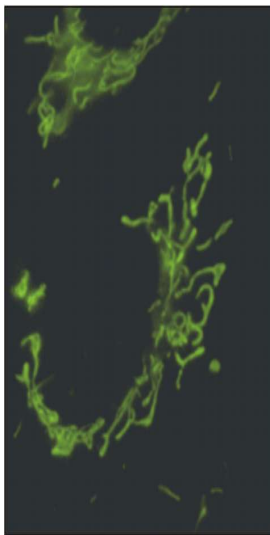

Drp1 + 1 $\mu$ g PINK1

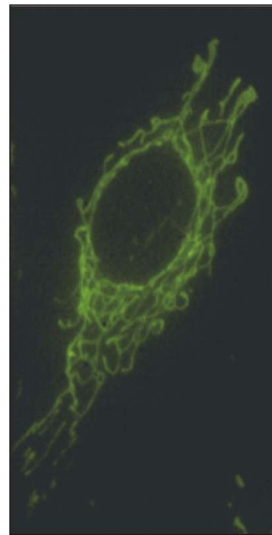

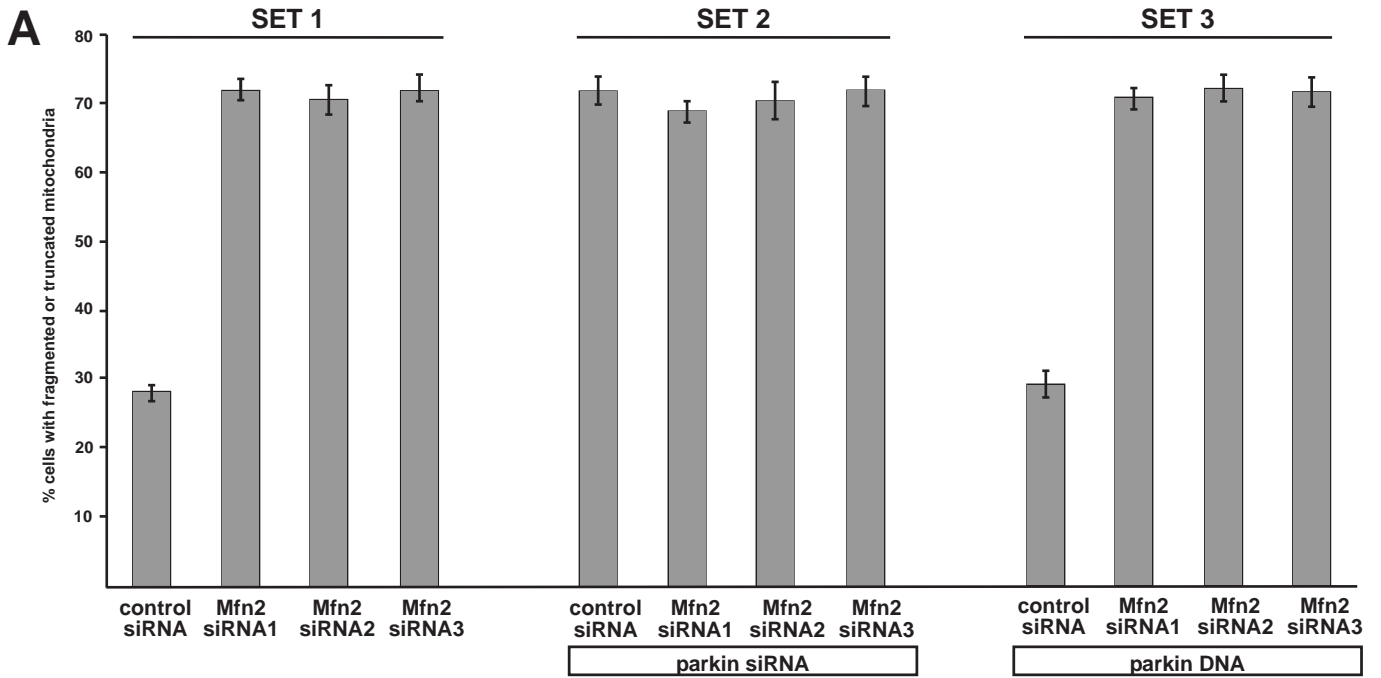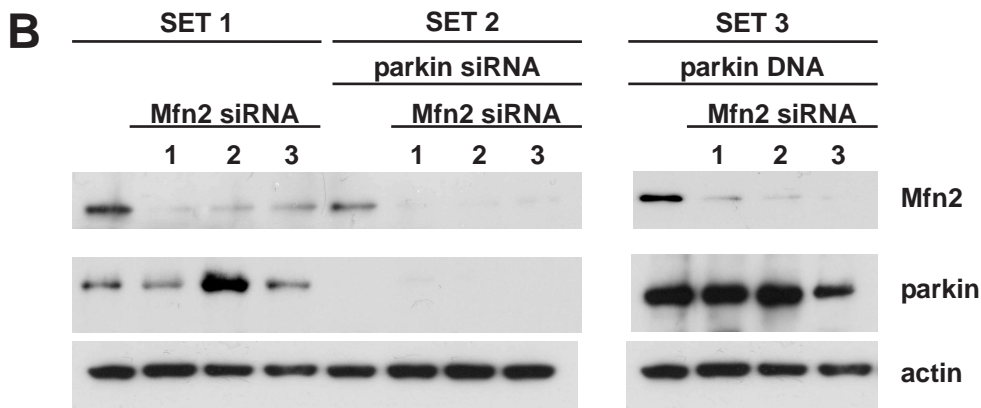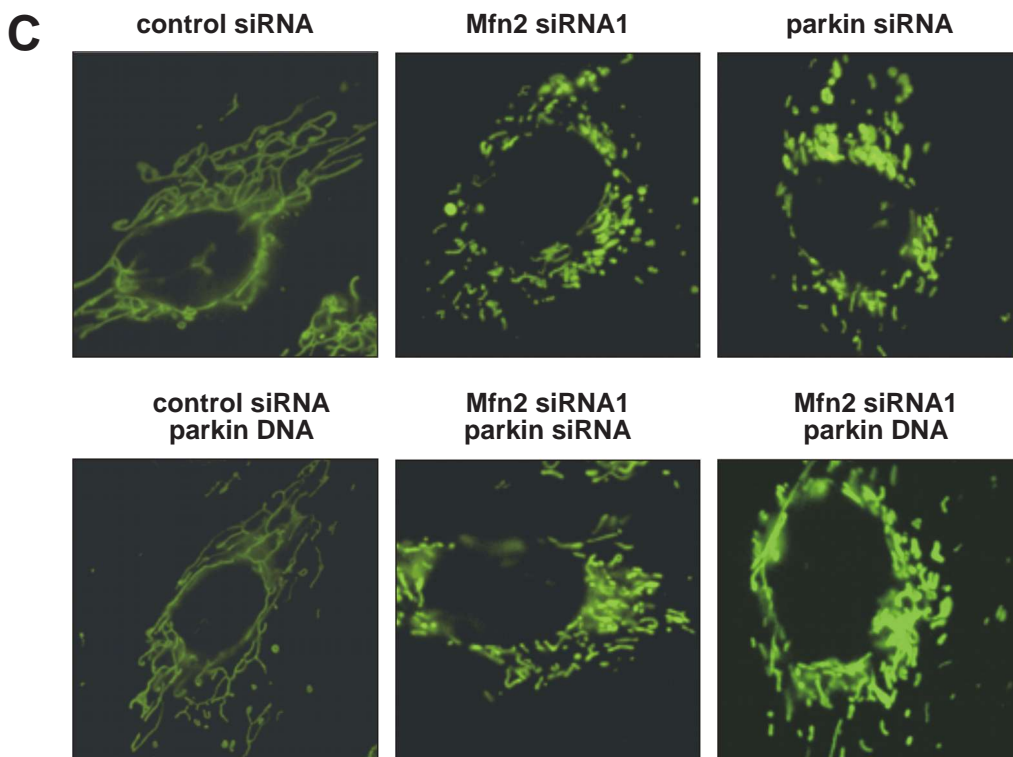

Supplement: supp_M109.035774_Supplement_Lutz.pdf [file supp_M109.035774_Supplement_Lutz.pdf]
